# Supplementary material
Source: Research Square preprint supplement (doi:10.21203/rs.3.rs-9945620/v1)
Supplement: Supplementary file 1 [file 355db44ec857253c470df29d.xlsx]

## Sheet: S1
Sampling						Biological		Environmental
Survey	Haul_number	Latitude	Longitude	Swept_area	Survey_year	Specie	Number_individuals	Haul_depth	Depth_ZMO	OMZ_condition	Dissolved_oxygen
JCFINP2002	11	15.2086	-99.7744	0.0989141	2020	Cubiceps pauciradiatus	22	30	120.855	Outside	173.724
JCFINP2002	11	15.2086	-99.7744	0.0989141	2020	Diaphus sp.	21	30	120.855	Outside	173.724
JCFINP2002	11	15.2086	-99.7744	0.0989141	2020	Dosidicus gigas	153	30	120.855	Outside	173.724
JCFINP2002	11	15.2086	-99.7744	0.0989141	2020	Enoploteuthidae	660	30	120.855	Outside	173.724
JCFINP2002	11	15.2086	-99.7744	0.0989141	2020	Gempylus serpens	1	30	120.855	Outside	173.724
JCFINP2002	11	15.2086	-99.7744	0.0989141	2020	Leachia sp.	81	30	120.855	Outside	173.724
JCFINP2002	11	15.2086	-99.7744	0.0989141	2020	Leptocephala (larvae)	62	30	120.855	Outside	173.724
JCFINP2002	11	15.2086	-99.7744	0.0989141	2020	Lestidiops neles	71	30	120.855	Outside	173.724
JCFINP2002	11	15.2086	-99.7744	0.0989141	2020	Myctophum sp.	3	30	120.855	Outside	173.724
JCFINP2002	11	15.2086	-99.7744	0.0989141	2020	Portunus sp.	38	30	120.855	Outside	173.724
JCFINP2002	11	15.2086	-99.7744	0.0989141	2020	Pyrosoma atlanticum	27	30	120.855	Outside	173.724
JCFINP2002	11	15.2086	-99.7744	0.0989141	2020	Salpidae	37	30	120.855	Outside	173.724
JCFINP2002	11	15.2086	-99.7744	0.0989141	2020	Trachipteridae	1	30	120.855	Outside	173.724
JCFINP2002	15	14.8523	-98.8449	0.072469	2020	Leptocephala (larvae)	1	42	131.998	Outside	195.972
JCFINP2002	15	14.8523	-98.8449	0.072469	2020	Pentacerotidae	2	42	131.998	Outside	195.972
JCFINP2002	15	14.8523	-98.8449	0.072469	2020	Portunus sp.	124	42	131.998	Outside	195.972
JCFINP2002	15	14.8523	-98.8449	0.072469	2020	Pyrosoma atlanticum	1	42	131.998	Outside	195.972
JCFINP2002	15	14.8523	-98.8449	0.072469	2020	Salpidae	11	42	131.998	Outside	195.972
JCFINP2002	16	15.8666	-97.9421	0.0998232	2020	Amphitretidae	1	188	107.969	Inside	29.1075
JCFINP2002	16	15.8666	-97.9421	0.0998232	2020	Engyophrys sp. (larvae)	1	188	107.969	Inside	29.1075
JCFINP2002	16	15.8666	-97.9421	0.0998232	2020	Enoploteuthidae	4	188	107.969	Inside	29.1075
JCFINP2002	16	15.8666	-97.9421	0.0998232	2020	Hemicaranx leucurus	5	188	107.969	Inside	29.1075
JCFINP2002	16	15.8666	-97.9421	0.0998232	2020	Leachia sp.	7	188	107.969	Inside	29.1075
JCFINP2002	16	15.8666	-97.9421	0.0998232	2020	Leptocephala (larvae)	1	188	107.969	Inside	29.1075
JCFINP2002	16	15.8666	-97.9421	0.0998232	2020	Myctophum sp.	4	188	107.969	Inside	29.1075
JCFINP2002	16	15.8666	-97.9421	0.0998232	2020	Pentacerotidae	1	188	107.969	Inside	29.1075
JCFINP2002	16	15.8666	-97.9421	0.0998232	2020	Phronima sedentaria	2	188	107.969	Inside	29.1075
JCFINP2002	16	15.8666	-97.9421	0.0998232	2020	Pyrosoma atlanticum	1	188	107.969	Inside	29.1075
JCFINP2002	16	15.8666	-97.9421	0.0998232	2020	Salpidae	4	188	107.969	Inside	29.1075
JCFINP2002	16	15.8666	-97.9421	0.0998232	2020	Sufflamen verres	1	188	107.969	Inside	29.1075
JCFINP2002	17	14.4435	-97.7563	0.102407	2020	Chloroscombrus orqueta	11	43	143.876	Outside	201.735
JCFINP2002	17	14.4435	-97.7563	0.102407	2020	Portunus sp.	95	43	143.876	Outside	201.735
JCFINP2002	17	14.4435	-97.7563	0.102407	2020	Regalecus glesne	1	43	143.876	Outside	201.735
JCFINP2002	17	14.4435	-97.7563	0.102407	2020	Selene peruviana	8	43	143.876	Outside	201.735
JCFINP2002	18	14.8212	-96.9347	0.0862825	2020	Engyophrys sp. (larvae)	3	15	138.311	Outside	188.324
JCFINP2002	18	14.8212	-96.9347	0.0862825	2020	Leachia sp.	3	15	138.311	Outside	188.324
JCFINP2002	18	14.8212	-96.9347	0.0862825	2020	Leptocephala (larvae)	33	15	138.311	Outside	188.324
JCFINP2002	18	14.8212	-96.9347	0.0862825	2020	Myctophum sp.	1	15	138.311	Outside	188.324
JCFINP2002	18	14.8212	-96.9347	0.0862825	2020	Naucrates ductor	1	15	138.311	Outside	188.324
JCFINP2002	18	14.8212	-96.9347	0.0862825	2020	Palinuridae (larvae)	2	15	138.311	Outside	188.324
JCFINP2002	18	14.8212	-96.9347	0.0862825	2020	Portunus sp.	7	15	138.311	Outside	188.324
JCFINP2002	18	14.8212	-96.9347	0.0862825	2020	Salpidae	37	15	138.311	Outside	188.324
JCFINP2002	18	14.8212	-96.9347	0.0862825	2020	Squilla sp. (larvae)	2	15	138.311	Outside	188.324
JCFINP2002	18	14.8212	-96.9347	0.0862825	2020	Sufflamen verres	1	15	138.311	Outside	188.324
JCFINP2002	19	15.6653	-95.8551	0.108169	2020	Cynoscion phoxocephalus	1	70	106.456	Outside	115.935
JCFINP2002	19	15.6653	-95.8551	0.108169	2020	Plesionika beebei	7933	70	106.456	Outside	115.935
JCFINP2002	19	15.6653	-95.8551	0.108169	2020	Pontinus sp. A	27	70	106.456	Outside	115.935
JCFINP2002	19	15.6653	-95.8551	0.108169	2020	Portunus sp.	3	70	106.456	Outside	115.935
JCFINP2002	19	15.6653	-95.8551	0.108169	2020	Psenes sio	1	70	106.456	Outside	115.935
JCFINP2002	19	15.6653	-95.8551	0.108169	2020	Squilla biformis	6	70	106.456	Outside	115.935
JCFINP2002	19	15.6653	-95.8551	0.108169	2020	Symbolophorus sp.	3895	70	106.456	Outside	115.935
JCFINP2002	20	15.4718	-95.0049	0.10186	2020	Argonauta nouryi	1748	6	76.8671	Outside	207.499
JCFINP2002	20	15.4718	-95.0049	0.10186	2020	Auxis brachydorax	38	6	76.8671	Outside	207.499
JCFINP2002	20	15.4718	-95.0049	0.10186	2020	Decapterus macrosoma	3	6	76.8671	Outside	207.499
JCFINP2002	20	15.4718	-95.0049	0.10186	2020	Naucrates ductor	1	6	76.8671	Outside	207.499
JCFINP2002	20	15.4718	-95.0049	0.10186	2020	Phtheirichthys lineatus	1	6	76.8671	Outside	207.499
JCFINP2002	20	15.4718	-95.0049	0.10186	2020	Portunus sp.	16	6	76.8671	Outside	207.499
JCFINP2002	20	15.4718	-95.0049	0.10186	2020	Sarda orientalis	43	6	76.8671	Outside	207.499
JCFINP2002	22	15.7293	-94.1131	0.0319388	2020	Cyclopsetta querna	50	30	70.8449	Outside	204.254
JCFINP2002	22	15.7293	-94.1131	0.0319388	2020	Diplectrum euryplectrum	150	30	70.8449	Outside	204.254
JCFINP2002	22	15.7293	-94.1131	0.0319388	2020	Engyophrys sanctilaurentii	90	30	70.8449	Outside	204.254
JCFINP2002	22	15.7293	-94.1131	0.0319388	2020	Grimothea planipes	4541	30	70.8449	Outside	204.254
JCFINP2002	22	15.7293	-94.1131	0.0319388	2020	Lepidochelys olivacea	1	30	70.8449	Outside	204.254
JCFINP2002	22	15.7293	-94.1131	0.0319388	2020	Monolene dubiosa	10	30	70.8449	Outside	204.254
JCFINP2002	22	15.7293	-94.1131	0.0319388	2020	Ophichthus sp.	10	30	70.8449	Outside	204.254
JCFINP2002	22	15.7293	-94.1131	0.0319388	2020	Ophidion imitator	50	30	70.8449	Outside	204.254
JCFINP2002	22	15.7293	-94.1131	0.0319388	2020	Peprilus snyderi	762	30	70.8449	Outside	204.254
JCFINP2002	22	15.7293	-94.1131	0.0319388	2020	Porifera	1	30	70.8449	Outside	204.254
JCFINP2002	22	15.7293	-94.1131	0.0319388	2020	Portunus sp.	140	30	70.8449	Outside	204.254
JCFINP2002	22	15.7293	-94.1131	0.0319388	2020	Prionotus stephanophrys	120	30	70.8449	Outside	204.254
JCFINP2002	22	15.7293	-94.1131	0.0319388	2020	Processa sp.	10	30	70.8449	Outside	204.254
JCFINP2002	22	15.7293	-94.1131	0.0319388	2020	Synodus evermanni	180	30	70.8449	Outside	204.254
JCFINP2002	23	15.1517	-94.407	0.0630803	2020	Argonauta nouryi	18	6	67.0878	Outside	202.497
JCFINP2002	23	15.1517	-94.407	0.0630803	2020	Caranx vinctus	1	6	67.0878	Outside	202.497
JCFINP2002	23	15.1517	-94.407	0.0630803	2020	Portunus sp.	23	6	67.0878	Outside	202.497
JCFINP2002	23	15.1517	-94.407	0.0630803	2020	Salpidae	1	6	67.0878	Outside	202.497
JCFINP2002	24	15.1791	-94.4196	0.0277578	2020	Lepophidium prorates	12	133	66.8281	Inside	29.6535
JCFINP2002	24	15.1791	-94.4196	0.0277578	2020	Monolene dubiosa	1	133	66.8281	Inside	29.6535
JCFINP2002	24	15.1791	-94.4196	0.0277578	2020	Ommastrephidae	1	133	66.8281	Inside	29.6535
JCFINP2002	24	15.1791	-94.4196	0.0277578	2020	Portunus sp.	4	133	66.8281	Inside	29.6535
JCFINP2002	24	15.1791	-94.4196	0.0277578	2020	Salpidae	2	133	66.8281	Inside	29.6535
JCFINP2002	24	15.1791	-94.4196	0.0277578	2020	Solenocera mutator	206	133	66.8281	Inside	29.6535
JCFINP2002	24	15.1791	-94.4196	0.0277578	2020	Squilla biformis	1556	133	66.8281	Inside	29.6535
JCFINP2002	25	14.0425	-94.2462	0.0726036	2020	Cyclopsetta sp. (larvae)	2	8	97.9397	Outside	208.459
JCFINP2002	25	14.0425	-94.2462	0.0726036	2020	Engyophrys sp. (larvae)	21	8	97.9397	Outside	208.459
JCFINP2002	25	14.0425	-94.2462	0.0726036	2020	Fistularia commersonii	2	8	97.9397	Outside	208.459
JCFINP2002	25	14.0425	-94.2462	0.0726036	2020	Portunus sp.	114	8	97.9397	Outside	208.459
JCFINP2002	25	14.0425	-94.2462	0.0726036	2020	Salpidae	1	8	97.9397	Outside	208.459
JCFINP2002	25	14.0425	-94.2462	0.0726036	2020	Selene peruviana	11	8	97.9397	Outside	208.459
JCFINP2002	25	14.0425	-94.2462	0.0726036	2020	Sphoeroides lobatus	1	8	97.9397	Outside	208.459
JCFINP2002	26	14.3924	-94.0401	0.0731718	2020	Amphitretidae	4	136	93.6638	Inside	47.2062
JCFINP2002	26	14.3924	-94.0401	0.0731718	2020	Engyophrys sp. (larvae)	2	136	93.6638	Inside	47.2062
JCFINP2002	26	14.3924	-94.0401	0.0731718	2020	Leptocephala (larvae)	19	136	93.6638	Inside	47.2062
JCFINP2002	26	14.3924	-94.0401	0.0731718	2020	Melamphaes sp.	1	136	93.6638	Inside	47.2062
JCFINP2002	26	14.3924	-94.0401	0.0731718	2020	Salpidae	1	136	93.6638	Inside	47.2062
JCFINP2002	26	14.3924	-94.0401	0.0731718	2020	Sergestes sp.	2	136	93.6638	Inside	47.2062
JCFINP2002	26	14.3924	-94.0401	0.0731718	2020	Squilla sp.	2	136	93.6638	Inside	47.2062
JCFINP2002	26	14.3924	-94.0401	0.0731718	2020	Vinciguerria lucetia	18213	136	93.6638	Inside	47.2062
JCFINP2002	27	15.0877	-93.399	0.0577537	2020	Chloeia sp.	4	36	99.4301	Outside	246.175
JCFINP2002	27	15.0877	-93.399	0.0577537	2020	Cyclopsetta querna	14	36	99.4301	Outside	246.175
JCFINP2002	27	15.0877	-93.399	0.0577537	2020	Etropus peruvianus	129	36	99.4301	Outside	246.175
JCFINP2002	27	15.0877	-93.399	0.0577537	2020	Grimothea planipes	1	36	99.4301	Outside	246.175
JCFINP2002	27	15.0877	-93.399	0.0577537	2020	Hymenopenaeus sp.	1	36	99.4301	Outside	246.175
JCFINP2002	27	15.0877	-93.399	0.0577537	2020	Lepidochelys olivacea	3	36	99.4301	Outside	246.175
JCFINP2002	27	15.0877	-93.399	0.0577537	2020	Monolene dubiosa	29	36	99.4301	Outside	246.175
JCFINP2002	27	15.0877	-93.399	0.0577537	2020	Octopodidae	1	36	99.4301	Outside	246.175
JCFINP2002	27	15.0877	-93.399	0.0577537	2020	Ophidion imitator	4	36	99.4301	Outside	246.175
JCFINP2002	27	15.0877	-93.399	0.0577537	2020	Ophidion sp.	1	36	99.4301	Outside	246.175
JCFINP2002	27	15.0877	-93.399	0.0577537	2020	Ophiuridae	1	36	99.4301	Outside	246.175
JCFINP2002	27	15.0877	-93.399	0.0577537	2020	Porifera	1	36	99.4301	Outside	246.175
JCFINP2002	27	15.0877	-93.399	0.0577537	2020	Portunus sp.	59	36	99.4301	Outside	246.175
JCFINP2002	27	15.0877	-93.399	0.0577537	2020	Prionotus stephanophrys	10	36	99.4301	Outside	246.175
JCFINP2002	27	15.0877	-93.399	0.0577537	2020	Scorpaena sp.	19	36	99.4301	Outside	246.175
JCFINP2002	27	15.0877	-93.399	0.0577537	2020	Squilla hancocki	4	36	99.4301	Outside	246.175
JCFINP2002	27	15.0877	-93.399	0.0577537	2020	Synchiropus atrilabiatus	5	36	99.4301	Outside	246.175
JCFINP2002	27	15.0877	-93.399	0.0577537	2020	Zalieutes elater	2	36	99.4301	Outside	246.175
JCFINP2002	28	14.8406	-93.1735	0.0547724	2020	Argonauta nouryi	16	10	117.193	Outside	205.118
JCFINP2002	28	14.8406	-93.1735	0.0547724	2020	Caranx vinctus	1	10	117.193	Outside	205.118
JCFINP2002	28	14.8406	-93.1735	0.0547724	2020	Chloroscombrus orqueta	74	10	117.193	Outside	205.118
JCFINP2002	28	14.8406	-93.1735	0.0547724	2020	Decapterus macrosoma	7	10	117.193	Outside	205.118
JCFINP2002	28	14.8406	-93.1735	0.0547724	2020	Hemicaranx leucurus	3	10	117.193	Outside	205.118
JCFINP2002	28	14.8406	-93.1735	0.0547724	2020	Lepidochelys olivacea	1	10	117.193	Outside	205.118
JCFINP2002	28	14.8406	-93.1735	0.0547724	2020	Ophidion sp.	2	10	117.193	Outside	205.118
JCFINP2002	28	14.8406	-93.1735	0.0547724	2020	Portunus sp.	3605	10	117.193	Outside	205.118
JCFINP2002	28	14.8406	-93.1735	0.0547724	2020	Sphoeroides lobatus	5	10	117.193	Outside	205.118
JCFINP2002	28	14.8406	-93.1735	0.0547724	2020	Sufflamen verres	1	10	117.193	Outside	205.118
JCFINP2002	29	14.0338	-92.9938	0.0947572	2020	Cyclopsetta sp. (larvae)	2	140	146.453	Outside	65.0787
JCFINP2002	29	14.0338	-92.9938	0.0947572	2020	Engyophrys sp. (larvae)	3	140	146.453	Outside	65.0787
JCFINP2002	29	14.0338	-92.9938	0.0947572	2020	Enoploteuthidae	4	140	146.453	Outside	65.0787
JCFINP2002	29	14.0338	-92.9938	0.0947572	2020	Leptocephala (larvae)	7	140	146.453	Outside	65.0787
JCFINP2002	29	14.0338	-92.9938	0.0947572	2020	Lophiodes spilurus	1	140	146.453	Outside	65.0787
JCFINP2002	29	14.0338	-92.9938	0.0947572	2020	Melamphaes sp.	1	140	146.453	Outside	65.0787
JCFINP2002	29	14.0338	-92.9938	0.0947572	2020	Pentacerotidae	1	140	146.453	Outside	65.0787
JCFINP2002	29	14.0338	-92.9938	0.0947572	2020	Phronima sedentaria	1	140	146.453	Outside	65.0787
JCFINP2002	29	14.0338	-92.9938	0.0947572	2020	Pontinus sp. A	2	140	146.453	Outside	65.0787
JCFINP2002	29	14.0338	-92.9938	0.0947572	2020	Portunus sp.	7	140	146.453	Outside	65.0787
JCFINP2002	29	14.0338	-92.9938	0.0947572	2020	Pyrosoma atlanticum	3	140	146.453	Outside	65.0787
JCFINP2002	29	14.0338	-92.9938	0.0947572	2020	Salpidae	1	140	146.453	Outside	65.0787
JCFINP2002	29	14.0338	-92.9938	0.0947572	2020	Squilla biformis	11	140	146.453	Outside	65.0787
JCFINP2002	29	14.0338	-92.9938	0.0947572	2020	Vinciguerria lucetia	2	140	146.453	Outside	65.0787
JCFINP2002	30	14.5767	-92.6595	0.0271056	2020	Apogon retrosella	1	24	141.164	Outside	214.986
JCFINP2002	30	14.5767	-92.6595	0.0271056	2020	Asteroidea	25	24	141.164	Outside	214.986
JCFINP2002	30	14.5767	-92.6595	0.0271056	2020	Bellator loxias	345	24	141.164	Outside	214.986
JCFINP2002	30	14.5767	-92.6595	0.0271056	2020	Bellator xenisma	3	24	141.164	Outside	214.986
JCFINP2002	30	14.5767	-92.6595	0.0271056	2020	Bothus constellatus	4	24	141.164	Outside	214.986
JCFINP2002	30	14.5767	-92.6595	0.0271056	2020	Chilomycterus reticulatus	2	24	141.164	Outside	214.986
JCFINP2002	30	14.5767	-92.6595	0.0271056	2020	Chloroscombrus orqueta	2	24	141.164	Outside	214.986
JCFINP2002	30	14.5767	-92.6595	0.0271056	2020	Cyclopsetta panamensis	1	24	141.164	Outside	214.986
JCFINP2002	30	14.5767	-92.6595	0.0271056	2020	Cyclopsetta querna	5	24	141.164	Outside	214.986
JCFINP2002	30	14.5767	-92.6595	0.0271056	2020	Diodon holocanthus	2	24	141.164	Outside	214.986
JCFINP2002	30	14.5767	-92.6595	0.0271056	2020	Diplectrum labarum	60	24	141.164	Outside	214.986
JCFINP2002	30	14.5767	-92.6595	0.0271056	2020	Etropus peruvianus	316	24	141.164	Outside	214.986
JCFINP2002	30	14.5767	-92.6595	0.0271056	2020	Farfantepenaeus brevirostris	10	24	141.164	Outside	214.986
JCFINP2002	30	14.5767	-92.6595	0.0271056	2020	Ficidae	3	24	141.164	Outside	214.986
JCFINP2002	30	14.5767	-92.6595	0.0271056	2020	Fistularia corneta	1	24	141.164	Outside	214.986
JCFINP2002	30	14.5767	-92.6595	0.0271056	2020	Fowlerichthys avalonis	1	24	141.164	Outside	214.986
JCFINP2002	30	14.5767	-92.6595	0.0271056	2020	Gymnothorax equatorialis	2	24	141.164	Outside	214.986
JCFINP2002	30	14.5767	-92.6595	0.0271056	2020	Haemulopsis nitida	50	24	141.164	Outside	214.986
JCFINP2002	30	14.5767	-92.6595	0.0271056	2020	Hemicaranx leucurus	1	24	141.164	Outside	214.986
JCFINP2002	30	14.5767	-92.6595	0.0271056	2020	Hepatus sp.	3	24	141.164	Outside	214.986
JCFINP2002	30	14.5767	-92.6595	0.0271056	2020	Lepidochelys olivacea	1	24	141.164	Outside	214.986
JCFINP2002	30	14.5767	-92.6595	0.0271056	2020	Lutjanus guttatus	65	24	141.164	Outside	214.986
JCFINP2002	30	14.5767	-92.6595	0.0271056	2020	Micropogonias altipinnis	1	24	141.164	Outside	214.986
JCFINP2002	30	14.5767	-92.6595	0.0271056	2020	Ophichthus sp.	2	24	141.164	Outside	214.986
JCFINP2002	30	14.5767	-92.6595	0.0271056	2020	Ophichthus zophochir	1	24	141.164	Outside	214.986
JCFINP2002	30	14.5767	-92.6595	0.0271056	2020	Porichthys margaritatus	10	24	141.164	Outside	214.986
JCFINP2002	30	14.5767	-92.6595	0.0271056	2020	Porifera	1	24	141.164	Outside	214.986
JCFINP2002	30	14.5767	-92.6595	0.0271056	2020	Portunus sp.	847	24	141.164	Outside	214.986
JCFINP2002	30	14.5767	-92.6595	0.0271056	2020	Prionotus albirostris	3	24	141.164	Outside	214.986
JCFINP2002	30	14.5767	-92.6595	0.0271056	2020	Prionotus ruscarius	2	24	141.164	Outside	214.986
JCFINP2002	30	14.5767	-92.6595	0.0271056	2020	Pristigenys serrula	36	24	141.164	Outside	214.986
JCFINP2002	30	14.5767	-92.6595	0.0271056	2020	Pseudupeneus grandisquamis	31	24	141.164	Outside	214.986
JCFINP2002	30	14.5767	-92.6595	0.0271056	2020	Rostroraja equatorialis	1	24	141.164	Outside	214.986
JCFINP2002	30	14.5767	-92.6595	0.0271056	2020	Scorpaena russula	177	24	141.164	Outside	214.986
JCFINP2002	30	14.5767	-92.6595	0.0271056	2020	Sicyonia disedwardsi	5	24	141.164	Outside	214.986
JCFINP2002	30	14.5767	-92.6595	0.0271056	2020	Sphoeroides lobatus	17	24	141.164	Outside	214.986
JCFINP2002	30	14.5767	-92.6595	0.0271056	2020	Squilla hancocki	8	24	141.164	Outside	214.986
JCFINP2002	30	14.5767	-92.6595	0.0271056	2020	Symphurus elongatus	9	24	141.164	Outside	214.986
JCFINP2002	30	14.5767	-92.6595	0.0271056	2020	Synodus evermanni	1	24	141.164	Outside	214.986
JCFINP2002	30	14.5767	-92.6595	0.0271056	2020	Synodus scituliceps	3	24	141.164	Outside	214.986
JCFINP2002	30	14.5767	-92.6595	0.0271056	2020	Zapteryx xyster	2	24	141.164	Outside	214.986
JCFINP2002	31	14.7387	-92.8174	0.0250967	2020	Asteroidea	18	20	132.824	Outside	215.945
JCFINP2002	31	14.7387	-92.8174	0.0250967	2020	Bellator loxias	586	20	132.824	Outside	215.945
JCFINP2002	31	14.7387	-92.8174	0.0250967	2020	Bellator xenisma	92	20	132.824	Outside	215.945
JCFINP2002	31	14.7387	-92.8174	0.0250967	2020	Diplectrum labarum	141	20	132.824	Outside	215.945
JCFINP2002	31	14.7387	-92.8174	0.0250967	2020	Etropus peruvianus	134	20	132.824	Outside	215.945
JCFINP2002	31	14.7387	-92.8174	0.0250967	2020	Farfantepenaeus brevirostris	10	20	132.824	Outside	215.945
JCFINP2002	31	14.7387	-92.8174	0.0250967	2020	Fistularia corneta	1	20	132.824	Outside	215.945
JCFINP2002	31	14.7387	-92.8174	0.0250967	2020	Fowlerichthys avalonis	1	20	132.824	Outside	215.945
JCFINP2002	31	14.7387	-92.8174	0.0250967	2020	Gymnura marmorata	1	20	132.824	Outside	215.945
JCFINP2002	31	14.7387	-92.8174	0.0250967	2020	Haemulopsis nitida	2	20	132.824	Outside	215.945
JCFINP2002	31	14.7387	-92.8174	0.0250967	2020	Lophiodes caulinaris	2	20	132.824	Outside	215.945
JCFINP2002	31	14.7387	-92.8174	0.0250967	2020	Lutjanus guttatus	7	20	132.824	Outside	215.945
JCFINP2002	31	14.7387	-92.8174	0.0250967	2020	Porichthys margaritatus	10	20	132.824	Outside	215.945
JCFINP2002	31	14.7387	-92.8174	0.0250967	2020	Porifera	1	20	132.824	Outside	215.945
JCFINP2002	31	14.7387	-92.8174	0.0250967	2020	Portunus sp.	320	20	132.824	Outside	215.945
JCFINP2002	31	14.7387	-92.8174	0.0250967	2020	Prionotus albirostris	4	20	132.824	Outside	215.945
JCFINP2002	31	14.7387	-92.8174	0.0250967	2020	Prionotus ruscarius	1	20	132.824	Outside	215.945
JCFINP2002	31	14.7387	-92.8174	0.0250967	2020	Prionotus stephanophrys	1	20	132.824	Outside	215.945
JCFINP2002	31	14.7387	-92.8174	0.0250967	2020	Pristigenys serrula	36	20	132.824	Outside	215.945
JCFINP2002	31	14.7387	-92.8174	0.0250967	2020	Pseudupeneus grandisquamis	22	20	132.824	Outside	215.945
JCFINP2002	31	14.7387	-92.8174	0.0250967	2020	Salpidae	14	20	132.824	Outside	215.945
JCFINP2002	31	14.7387	-92.8174	0.0250967	2020	Scorpaena russula	60	20	132.824	Outside	215.945
JCFINP2002	31	14.7387	-92.8174	0.0250967	2020	Sicyonia martini	1	20	132.824	Outside	215.945
JCFINP2002	31	14.7387	-92.8174	0.0250967	2020	Solenocera florea	67	20	132.824	Outside	215.945
JCFINP2002	31	14.7387	-92.8174	0.0250967	2020	Sphoeroides lobatus	21	20	132.824	Outside	215.945
JCFINP2002	31	14.7387	-92.8174	0.0250967	2020	Squilla hancocki	5	20	132.824	Outside	215.945
JCFINP2002	31	14.7387	-92.8174	0.0250967	2020	Symphurus elongatus	6	20	132.824	Outside	215.945
JCFINP2002	31	14.7387	-92.8174	0.0250967	2020	Synodus evermanni	6	20	132.824	Outside	215.945
JCFINP2002	31	14.7387	-92.8174	0.0250967	2020	Synodus scituliceps	4	20	132.824	Outside	215.945
JCFINP2002	31	14.7387	-92.8174	0.0250967	2020	Trachysalambria brevisuturae	1	20	132.824	Outside	215.945
JCFINP2002	31	14.7387	-92.8174	0.0250967	2020	Zapteryx xyster	2	20	132.824	Outside	215.945
JCFINP2103	1	15.3738	-97.4473	0.105495	2021	Bregmaceros bathymaster	186	114	45.4364	Inside	5.12775
JCFINP2103	1	15.3738	-97.4473	0.105495	2021	Leptocephala (larvae)	1	114	45.4364	Inside	5.12775
JCFINP2103	1	15.3738	-97.4473	0.105495	2021	Phronima sedentaria	1	114	45.4364	Inside	5.12775
JCFINP2103	1	15.3738	-97.4473	0.105495	2021	Portunus sp.	8	114	45.4364	Inside	5.12775
JCFINP2103	1	15.3738	-97.4473	0.105495	2021	Pyrosoma atlanticum	2	114	45.4364	Inside	5.12775
JCFINP2103	1	15.3738	-97.4473	0.105495	2021	Salpidae	36	114	45.4364	Inside	5.12775
JCFINP2103	10	15.7959	-95.5508	0.102675	2021	Argonauta nouryi	21	10	37.0785	Outside	143.56
JCFINP2103	10	15.7959	-95.5508	0.102675	2021	Chloroscombrus orqueta	1	10	37.0785	Outside	143.56
JCFINP2103	10	15.7959	-95.5508	0.102675	2021	Hydrozoa sp.1	37	10	37.0785	Outside	143.56
JCFINP2103	10	15.7959	-95.5508	0.102675	2021	Hydrozoa sp.2	8	10	37.0785	Outside	143.56
JCFINP2103	10	15.7959	-95.5508	0.102675	2021	Lagocephalus lagocephalus	1	10	37.0785	Outside	143.56
JCFINP2103	10	15.7959	-95.5508	0.102675	2021	Loliginidae	1	10	37.0785	Outside	143.56
JCFINP2103	10	15.7959	-95.5508	0.102675	2021	Pentacerotidae	3	10	37.0785	Outside	143.56
JCFINP2103	10	15.7959	-95.5508	0.102675	2021	Portunus sp.	22	10	37.0785	Outside	143.56
JCFINP2103	10	15.7959	-95.5508	0.102675	2021	Rhinoptera steindachneri	2	10	37.0785	Outside	143.56
JCFINP2103	10	15.7959	-95.5508	0.102675	2021	Selene peruviana	4	10	37.0785	Outside	143.56
JCFINP2103	10	15.7959	-95.5508	0.102675	2021	Serranidae	1	10	37.0785	Outside	143.56
JCFINP2103	12	15.6177	-94.7793	0.08578	2021	Argonauta nouryi	5	8	24.5788	Outside	146.762
JCFINP2103	12	15.6177	-94.7793	0.08578	2021	Bothidae (larvae)	1	8	24.5788	Outside	146.762
JCFINP2103	12	15.6177	-94.7793	0.08578	2021	Cyclopsetta querna	1	8	24.5788	Outside	146.762
JCFINP2103	12	15.6177	-94.7793	0.08578	2021	Cynoscion phoxocephalus	1	8	24.5788	Outside	146.762
JCFINP2103	12	15.6177	-94.7793	0.08578	2021	Enoploteuthidae	3	8	24.5788	Outside	146.762
JCFINP2103	12	15.6177	-94.7793	0.08578	2021	Hydrozoa sp.1	3	8	24.5788	Outside	146.762
JCFINP2103	12	15.6177	-94.7793	0.08578	2021	Hydrozoa sp.3	2	8	24.5788	Outside	146.762
JCFINP2103	12	15.6177	-94.7793	0.08578	2021	Leptocephala (larvae)	2	8	24.5788	Outside	146.762
JCFINP2103	12	15.6177	-94.7793	0.08578	2021	Myctophidae	1	8	24.5788	Outside	146.762
JCFINP2103	12	15.6177	-94.7793	0.08578	2021	Plesionika sp.	1	8	24.5788	Outside	146.762
JCFINP2103	12	15.6177	-94.7793	0.08578	2021	Portunus sp.	69	8	24.5788	Outside	146.762
JCFINP2103	12	15.6177	-94.7793	0.08578	2021	Prionotus stephanophrys	2	8	24.5788	Outside	146.762
JCFINP2103	12	15.6177	-94.7793	0.08578	2021	Psenes sio	3	8	24.5788	Outside	146.762
JCFINP2103	12	15.6177	-94.7793	0.08578	2021	Pyrosoma atlanticum	1	8	24.5788	Outside	146.762
JCFINP2103	12	15.6177	-94.7793	0.08578	2021	Salpidae	6	8	24.5788	Outside	146.762
JCFINP2103	12	15.6177	-94.7793	0.08578	2021	Scorpaena russula	3	8	24.5788	Outside	146.762
JCFINP2103	12	15.6177	-94.7793	0.08578	2021	Solenocera mutator	12	8	24.5788	Outside	146.762
JCFINP2103	13	14.3844	-95.0924	0.10722	2021	Argentinidae	3	10	25.7319	Outside	144.35
JCFINP2103	13	14.3844	-95.0924	0.10722	2021	Bothidae (larvae)	5	10	25.7319	Outside	144.35
JCFINP2103	13	14.3844	-95.0924	0.10722	2021	Cherublemma emmelas	1	10	25.7319	Outside	144.35
JCFINP2103	13	14.3844	-95.0924	0.10722	2021	Dosidicus gigas	3	10	25.7319	Outside	144.35
JCFINP2103	13	14.3844	-95.0924	0.10722	2021	Enoploteuthidae	12	10	25.7319	Outside	144.35
JCFINP2103	13	14.3844	-95.0924	0.10722	2021	Euphausiidae	2	10	25.7319	Outside	144.35
JCFINP2103	13	14.3844	-95.0924	0.10722	2021	Hygophum sp.	16	10	25.7319	Outside	144.35
JCFINP2103	13	14.3844	-95.0924	0.10722	2021	Japetella diaphana	1	10	25.7319	Outside	144.35
JCFINP2103	13	14.3844	-95.0924	0.10722	2021	Leachia sp.	17	10	25.7319	Outside	144.35
JCFINP2103	13	14.3844	-95.0924	0.10722	2021	Leptocephala (larvae)	19	10	25.7319	Outside	144.35
JCFINP2103	13	14.3844	-95.0924	0.10722	2021	Lestidiops neles	2	10	25.7319	Outside	144.35
JCFINP2103	13	14.3844	-95.0924	0.10722	2021	Malacanthidae	18	10	25.7319	Outside	144.35
JCFINP2103	13	14.3844	-95.0924	0.10722	2021	Myctophidae	2	10	25.7319	Outside	144.35
JCFINP2103	13	14.3844	-95.0924	0.10722	2021	Nemichthys scolopaceus	1	10	25.7319	Outside	144.35
JCFINP2103	13	14.3844	-95.0924	0.10722	2021	Phronima sedentaria	4	10	25.7319	Outside	144.35
JCFINP2103	13	14.3844	-95.0924	0.10722	2021	Portunus sp.	13	10	25.7319	Outside	144.35
JCFINP2103	13	14.3844	-95.0924	0.10722	2021	Psenes sio	1	10	25.7319	Outside	144.35
JCFINP2103	13	14.3844	-95.0924	0.10722	2021	Squilla biformis	2	10	25.7319	Outside	144.35
JCFINP2103	13	14.3844	-95.0924	0.10722	2021	Stomiidae	8	10	25.7319	Outside	144.35
JCFINP2103	13	14.3844	-95.0924	0.10722	2021	Symbolophorus sp.	3	10	25.7319	Outside	144.35
JCFINP2103	13	14.3844	-95.0924	0.10722	2021	Vinciguerria lucetia	4	10	25.7319	Outside	144.35
JCFINP2103	14	15.3079	-94.6446	0.040084	2021	Bregmaceros bathymaster	2	128	18.4421	Inside	1.39285
JCFINP2103	14	15.3079	-94.6446	0.040084	2021	Echinorhinus cookei	1	128	18.4421	Inside	1.39285
JCFINP2103	14	15.3079	-94.6446	0.040084	2021	Lepophidium prorates	5	128	18.4421	Inside	1.39285
JCFINP2103	14	15.3079	-94.6446	0.040084	2021	Merluccius productus	1	128	18.4421	Inside	1.39285
JCFINP2103	14	15.3079	-94.6446	0.040084	2021	Monolene dubiosa	1	128	18.4421	Inside	1.39285
JCFINP2103	14	15.3079	-94.6446	0.040084	2021	Scorpaena russula	4	128	18.4421	Inside	1.39285
JCFINP2103	14	15.3079	-94.6446	0.040084	2021	Solenocera mutator	134	128	18.4421	Inside	1.39285
JCFINP2103	14	15.3079	-94.6446	0.040084	2021	Squilla biformis	40688	128	18.4421	Inside	1.39285
JCFINP2103	15	15.7723	-94.1338	0.0678943	2021	Bothidae (larvae)	1	8	23.6905	Outside	147.533
JCFINP2103	15	15.7723	-94.1338	0.0678943	2021	Decapterus macrosoma	76	8	23.6905	Outside	147.533
JCFINP2103	15	15.7723	-94.1338	0.0678943	2021	Lepidochelys olivacea	1	8	23.6905	Outside	147.533
JCFINP2103	15	15.7723	-94.1338	0.0678943	2021	Loliginidae	3	8	23.6905	Outside	147.533
JCFINP2103	15	15.7723	-94.1338	0.0678943	2021	Naucrates ductor	1	8	23.6905	Outside	147.533
JCFINP2103	15	15.7723	-94.1338	0.0678943	2021	Peprilus snyderi	34	8	23.6905	Outside	147.533
JCFINP2103	15	15.7723	-94.1338	0.0678943	2021	Selar crumenophthalmus	2	8	23.6905	Outside	147.533
JCFINP2103	15	15.7723	-94.1338	0.0678943	2021	Selene peruviana	42	8	23.6905	Outside	147.533
JCFINP2103	16	14.969	-94.5253	0.106779	2021	Benthosema panamense	9	7	15.8828	Outside	147.807
JCFINP2103	16	14.969	-94.5253	0.106779	2021	Dosidicus gigas	1	7	15.8828	Outside	147.807
JCFINP2103	16	14.969	-94.5253	0.106779	2021	Hydrozoa sp.2	2	7	15.8828	Outside	147.807
JCFINP2103	16	14.969	-94.5253	0.106779	2021	Leptocephala (larvae)	21	7	15.8828	Outside	147.807
JCFINP2103	16	14.969	-94.5253	0.106779	2021	Ophidiidae	1	7	15.8828	Outside	147.807
JCFINP2103	16	14.969	-94.5253	0.106779	2021	Phronima sedentaria	16	7	15.8828	Outside	147.807
JCFINP2103	16	14.969	-94.5253	0.106779	2021	Portunus sp.	23	7	15.8828	Outside	147.807
JCFINP2103	16	14.969	-94.5253	0.106779	2021	Pterotrachea coronata	1	7	15.8828	Outside	147.807
JCFINP2103	16	14.969	-94.5253	0.106779	2021	Pyrosoma atlanticum	2	7	15.8828	Outside	147.807
JCFINP2103	16	14.969	-94.5253	0.106779	2021	Scyphozoa	2	7	15.8828	Outside	147.807
JCFINP2103	16	14.969	-94.5253	0.106779	2021	Squilla biformis	5	7	15.8828	Outside	147.807
JCFINP2103	16	14.969	-94.5253	0.106779	2021	Vinciguerria lucetia	11	7	15.8828	Outside	147.807
JCFINP2103	17	14.4584	-94.7738	0.120231	2021	Enoploteuthidae	1	100	21.1649	Inside	1.51238
JCFINP2103	17	14.4584	-94.7738	0.120231	2021	Hydrozoa sp.2	15	100	21.1649	Inside	1.51238
JCFINP2103	17	14.4584	-94.7738	0.120231	2021	Japetella diaphana	1	100	21.1649	Inside	1.51238
JCFINP2103	17	14.4584	-94.7738	0.120231	2021	Lepophidium prorates	3	100	21.1649	Inside	1.51238
JCFINP2103	17	14.4584	-94.7738	0.120231	2021	Leptocephala (larvae)	81	100	21.1649	Inside	1.51238
JCFINP2103	17	14.4584	-94.7738	0.120231	2021	Phronima sedentaria	7	100	21.1649	Inside	1.51238
JCFINP2103	17	14.4584	-94.7738	0.120231	2021	Portunus sp.	4	100	21.1649	Inside	1.51238
JCFINP2103	17	14.4584	-94.7738	0.120231	2021	Pterotrachea coronata	2	100	21.1649	Inside	1.51238
JCFINP2103	17	14.4584	-94.7738	0.120231	2021	Scyphozoa	1	100	21.1649	Inside	1.51238
JCFINP2103	17	14.4584	-94.7738	0.120231	2021	Selene peruviana	1	100	21.1649	Inside	1.51238
JCFINP2103	17	14.4584	-94.7738	0.120231	2021	Squilla biformis	41	100	21.1649	Inside	1.51238
JCFINP2103	17	14.4584	-94.7738	0.120231	2021	Vinciguerria lucetia	2004	100	21.1649	Inside	1.51238
JCFINP2103	18	14.8407	-94.3038	0.104078	2021	Bregmaceros bathymaster	162	84	15.5366	Inside	3.39755
JCFINP2103	18	14.8407	-94.3038	0.104078	2021	Hydrozoa sp.2	4	84	15.5366	Inside	3.39755
JCFINP2103	18	14.8407	-94.3038	0.104078	2021	Hydrozoa sp.3	1	84	15.5366	Inside	3.39755
JCFINP2103	18	14.8407	-94.3038	0.104078	2021	Japetella diaphana	2	84	15.5366	Inside	3.39755
JCFINP2103	18	14.8407	-94.3038	0.104078	2021	Leptocephala (larvae)	27	84	15.5366	Inside	3.39755
JCFINP2103	18	14.8407	-94.3038	0.104078	2021	Onychoteuthis sp.	1	84	15.5366	Inside	3.39755
JCFINP2103	18	14.8407	-94.3038	0.104078	2021	Phronima sedentaria	2	84	15.5366	Inside	3.39755
JCFINP2103	18	14.8407	-94.3038	0.104078	2021	Pterotrachea coronata	7	84	15.5366	Inside	3.39755
JCFINP2103	19	15.691	-93.8895	0.0828886	2021	Chloroscombrus orqueta	11491	6	24.5527	Outside	151.121
JCFINP2103	19	15.691	-93.8895	0.0828886	2021	Decapterus macrosoma	117	6	24.5527	Outside	151.121
JCFINP2103	19	15.691	-93.8895	0.0828886	2021	Lagocephalus lagocephalus	2	6	24.5527	Outside	151.121
JCFINP2103	19	15.691	-93.8895	0.0828886	2021	Loliginidae	2	6	24.5527	Outside	151.121
JCFINP2103	19	15.691	-93.8895	0.0828886	2021	Opisthonema spp.	806	6	24.5527	Outside	151.121
JCFINP2103	19	15.691	-93.8895	0.0828886	2021	Peprilus snyderi	5	6	24.5527	Outside	151.121
JCFINP2103	19	15.691	-93.8895	0.0828886	2021	Selene brevoortii	2	6	24.5527	Outside	151.121
JCFINP2103	2	15.5946	-97.065	0.103592	2021	Bothidae (larvae)	25	26	50.9892	Outside	138.541
JCFINP2103	2	15.5946	-97.065	0.103592	2021	Cyclopsetta querna	3	26	50.9892	Outside	138.541
JCFINP2103	2	15.5946	-97.065	0.103592	2021	Dosidicus gigas	3	26	50.9892	Outside	138.541
JCFINP2103	2	15.5946	-97.065	0.103592	2021	Leachia sp.	5	26	50.9892	Outside	138.541
JCFINP2103	2	15.5946	-97.065	0.103592	2021	Leptocephala (larvae)	10	26	50.9892	Outside	138.541
JCFINP2103	2	15.5946	-97.065	0.103592	2021	Phronima sedentaria	13	26	50.9892	Outside	138.541
JCFINP2103	2	15.5946	-97.065	0.103592	2021	Portunus sp.	28	26	50.9892	Outside	138.541
JCFINP2103	2	15.5946	-97.065	0.103592	2021	Pterotrachea coronata	1	26	50.9892	Outside	138.541
JCFINP2103	2	15.5946	-97.065	0.103592	2021	Pyrosoma atlanticum	12	26	50.9892	Outside	138.541
JCFINP2103	2	15.5946	-97.065	0.103592	2021	Salpidae	1	26	50.9892	Outside	138.541
JCFINP2103	2	15.5946	-97.065	0.103592	2021	Squilla sp.	1	26	50.9892	Outside	138.541
JCFINP2103	20	15.5365	-93.6798	0.0811796	2021	Argonauta nouryi	6	15	25.8427	Outside	159.771
JCFINP2103	20	15.5365	-93.6798	0.0811796	2021	Auxis brachydorax	1	15	25.8427	Outside	159.771
JCFINP2103	20	15.5365	-93.6798	0.0811796	2021	Chloroscombrus orqueta	117	15	25.8427	Outside	159.771
JCFINP2103	20	15.5365	-93.6798	0.0811796	2021	Decapterus macrosoma	16	15	25.8427	Outside	159.771
JCFINP2103	20	15.5365	-93.6798	0.0811796	2021	Hemicaranx leucurus	1	15	25.8427	Outside	159.771
JCFINP2103	20	15.5365	-93.6798	0.0811796	2021	Hydrozoa sp.1	1	15	25.8427	Outside	159.771
JCFINP2103	20	15.5365	-93.6798	0.0811796	2021	Loliginidae	8	15	25.8427	Outside	159.771
JCFINP2103	20	15.5365	-93.6798	0.0811796	2021	Opisthonema spp.	2	15	25.8427	Outside	159.771
JCFINP2103	20	15.5365	-93.6798	0.0811796	2021	Pyrosoma atlanticum	1	15	25.8427	Outside	159.771
JCFINP2103	20	15.5365	-93.6798	0.0811796	2021	Salpidae	2	15	25.8427	Outside	159.771
JCFINP2103	20	15.5365	-93.6798	0.0811796	2021	Selar crumenophthalmus	5	15	25.8427	Outside	159.771
JCFINP2103	20	15.5365	-93.6798	0.0811796	2021	Selene peruviana	2	15	25.8427	Outside	159.771
JCFINP2103	21	14.0337	-94.1336	0.0842197	2021	Argonauta nouryi	3	10	22.5886	Outside	145.06
JCFINP2103	21	14.0337	-94.1336	0.0842197	2021	Dosidicus gigas	244	10	22.5886	Outside	145.06
JCFINP2103	21	14.0337	-94.1336	0.0842197	2021	Enoploteuthidae	428	10	22.5886	Outside	145.06
JCFINP2103	21	14.0337	-94.1336	0.0842197	2021	Hygophum sp.	647	10	22.5886	Outside	145.06
JCFINP2103	21	14.0337	-94.1336	0.0842197	2021	Leachia sp.	699	10	22.5886	Outside	145.06
JCFINP2103	21	14.0337	-94.1336	0.0842197	2021	Leptocephala (larvae)	762	10	22.5886	Outside	145.06
JCFINP2103	21	14.0337	-94.1336	0.0842197	2021	Lestidiops neles	230	10	22.5886	Outside	145.06
JCFINP2103	21	14.0337	-94.1336	0.0842197	2021	Onychoteuthis banksii	31	10	22.5886	Outside	145.06
JCFINP2103	21	14.0337	-94.1336	0.0842197	2021	Peprilus snyderi	6	10	22.5886	Outside	145.06
JCFINP2103	21	14.0337	-94.1336	0.0842197	2021	Portunus sp.	73	10	22.5886	Outside	145.06
JCFINP2103	21	14.0337	-94.1336	0.0842197	2021	Psenes sio	69	10	22.5886	Outside	145.06
JCFINP2103	21	14.0337	-94.1336	0.0842197	2021	Scyphozoa	1	10	22.5886	Outside	145.06
JCFINP2103	21	14.0337	-94.1336	0.0842197	2021	Trachipteridae	2	10	22.5886	Outside	145.06
JCFINP2103	21	14.0337	-94.1336	0.0842197	2021	Vinciguerria lucetia	11560	10	22.5886	Outside	145.06
JCFINP2103	22	15.3556	-93.4821	0.0905119	2021	Chloroscombrus orqueta	14864	8	28.3023	Outside	147.519
JCFINP2103	22	15.3556	-93.4821	0.0905119	2021	Decapterus macrosoma	67	8	28.3023	Outside	147.519
JCFINP2103	22	15.3556	-93.4821	0.0905119	2021	Eucinostomus gracilis	14	8	28.3023	Outside	147.519
JCFINP2103	22	15.3556	-93.4821	0.0905119	2021	Loliginidae	14	8	28.3023	Outside	147.519
JCFINP2103	22	15.3556	-93.4821	0.0905119	2021	Occidentarius platypogon	38	8	28.3023	Outside	147.519
JCFINP2103	22	15.3556	-93.4821	0.0905119	2021	Opisthonema spp.	1416	8	28.3023	Outside	147.519
JCFINP2103	22	15.3556	-93.4821	0.0905119	2021	Selene peruviana	386	8	28.3023	Outside	147.519
JCFINP2103	23	15.1804	-93.283	0.0952159	2021	Chloroscombrus orqueta	1	8	31.7568	Outside	147.435
JCFINP2103	23	15.1804	-93.283	0.0952159	2021	Decapterus macrosoma	6	8	31.7568	Outside	147.435
JCFINP2103	23	15.1804	-93.283	0.0952159	2021	Lepidochelys olivacea	2	8	31.7568	Outside	147.435
JCFINP2103	23	15.1804	-93.283	0.0952159	2021	Loliginidae	55	8	31.7568	Outside	147.435
JCFINP2103	23	15.1804	-93.283	0.0952159	2021	Mobula sp.	3	8	31.7568	Outside	147.435
JCFINP2103	23	15.1804	-93.283	0.0952159	2021	Occidentarius platypogon	33	8	31.7568	Outside	147.435
JCFINP2103	23	15.1804	-93.283	0.0952159	2021	Peprilus snyderi	1	8	31.7568	Outside	147.435
JCFINP2103	23	15.1804	-93.283	0.0952159	2021	Portunus sp.	20	8	31.7568	Outside	147.435
JCFINP2103	23	15.1804	-93.283	0.0952159	2021	Selar crumenophthalmus	27	8	31.7568	Outside	147.435
JCFINP2103	23	15.1804	-93.283	0.0952159	2021	Selene peruviana	8	8	31.7568	Outside	147.435
JCFINP2103	24	14.0325	-93.8519	0.182914	2021	Hydrozoa sp.2	5	106	25.6199	Inside	8.18007
JCFINP2103	24	14.0325	-93.8519	0.182914	2021	Hydrozoa sp.3	8	106	25.6199	Inside	8.18007
JCFINP2103	24	14.0325	-93.8519	0.182914	2021	Japetella diaphana	9	106	25.6199	Inside	8.18007
JCFINP2103	24	14.0325	-93.8519	0.182914	2021	Lepophidium prorates	3	106	25.6199	Inside	8.18007
JCFINP2103	24	14.0325	-93.8519	0.182914	2021	Leptocephala (larvae)	43	106	25.6199	Inside	8.18007
JCFINP2103	24	14.0325	-93.8519	0.182914	2021	Onychoteuthis sp.	1	106	25.6199	Inside	8.18007
JCFINP2103	24	14.0325	-93.8519	0.182914	2021	Phronima sedentaria	232	106	25.6199	Inside	8.18007
JCFINP2103	24	14.0325	-93.8519	0.182914	2021	Portunus sp.	3	106	25.6199	Inside	8.18007
JCFINP2103	24	14.0325	-93.8519	0.182914	2021	Salpidae	1	106	25.6199	Inside	8.18007
JCFINP2103	24	14.0325	-93.8519	0.182914	2021	Scorpaena sp.	1	106	25.6199	Inside	8.18007
JCFINP2103	24	14.0325	-93.8519	0.182914	2021	Sergestidae	39	106	25.6199	Inside	8.18007
JCFINP2103	24	14.0325	-93.8519	0.182914	2021	Squilla sp.	1317	106	25.6199	Inside	8.18007
JCFINP2103	24	14.0325	-93.8519	0.182914	2021	Vinciguerria lucetia	1076	106	25.6199	Inside	8.18007
JCFINP2103	26	14.9103	-92.9218	0.0809532	2021	Anchoa sp.	48	8	38.0878	Outside	147.367
JCFINP2103	26	14.9103	-92.9218	0.0809532	2021	Chloroscombrus orqueta	48762	8	38.0878	Outside	147.367
JCFINP2103	26	14.9103	-92.9218	0.0809532	2021	Decapterus macrosoma	129	8	38.0878	Outside	147.367
JCFINP2103	26	14.9103	-92.9218	0.0809532	2021	Eucinostomus gracilis	32	8	38.0878	Outside	147.367
JCFINP2103	26	14.9103	-92.9218	0.0809532	2021	Loliginidae	64	8	38.0878	Outside	147.367
JCFINP2103	26	14.9103	-92.9218	0.0809532	2021	Opisthonema spp.	901	8	38.0878	Outside	147.367
JCFINP2103	26	14.9103	-92.9218	0.0809532	2021	Paraselene orstedii	32	8	38.0878	Outside	147.367
JCFINP2103	26	14.9103	-92.9218	0.0809532	2021	Peprilus snyderi	97	8	38.0878	Outside	147.367
JCFINP2103	26	14.9103	-92.9218	0.0809532	2021	Selar crumenophthalmus	145	8	38.0878	Outside	147.367
JCFINP2103	26	14.9103	-92.9218	0.0809532	2021	Selene peruviana	499	8	38.0878	Outside	147.367
JCFINP2103	26	14.9103	-92.9218	0.0809532	2021	Sphyraena ensis	16	8	38.0878	Outside	147.367
JCFINP2103	27	14.7753	-92.9149	0.0911909	2021	Argonauta nouryi	2	10	38.4597	Outside	145.523
JCFINP2103	27	14.7753	-92.9149	0.0911909	2021	Hypanus longus	1	10	38.4597	Outside	145.523
JCFINP2103	27	14.7753	-92.9149	0.0911909	2021	Lagocephalus lagocephalus	1	10	38.4597	Outside	145.523
JCFINP2103	27	14.7753	-92.9149	0.0911909	2021	Lepidochelys olivacea	1	10	38.4597	Outside	145.523
JCFINP2103	27	14.7753	-92.9149	0.0911909	2021	Loliginidae	56	10	38.4597	Outside	145.523
JCFINP2103	27	14.7753	-92.9149	0.0911909	2021	Peprilus snyderi	84	10	38.4597	Outside	145.523
JCFINP2103	27	14.7753	-92.9149	0.0911909	2021	Selene peruviana	8	10	38.4597	Outside	145.523
JCFINP2103	28	14.1905	-92.9228	0.107678	2021	Argyropelecus aculeatus	1	159	40.1133	Inside	6.54649
JCFINP2103	28	14.1905	-92.9228	0.107678	2021	Bothidae (larvae)	2	159	40.1133	Inside	6.54649
JCFINP2103	28	14.1905	-92.9228	0.107678	2021	Bregmaceros bathymaster	1	159	40.1133	Inside	6.54649
JCFINP2103	28	14.1905	-92.9228	0.107678	2021	Hydrozoa sp.1	2	159	40.1133	Inside	6.54649
JCFINP2103	28	14.1905	-92.9228	0.107678	2021	Hydrozoa sp.3	1	159	40.1133	Inside	6.54649
JCFINP2103	28	14.1905	-92.9228	0.107678	2021	Japetella diaphana	1	159	40.1133	Inside	6.54649
JCFINP2103	28	14.1905	-92.9228	0.107678	2021	Leptocephala (larvae)	1	159	40.1133	Inside	6.54649
JCFINP2103	28	14.1905	-92.9228	0.107678	2021	Lophiodes spilurus	1	159	40.1133	Inside	6.54649
JCFINP2103	28	14.1905	-92.9228	0.107678	2021	Onychoteuthis banksii	1	159	40.1133	Inside	6.54649
JCFINP2103	28	14.1905	-92.9228	0.107678	2021	Phronima sedentaria	1	159	40.1133	Inside	6.54649
JCFINP2103	28	14.1905	-92.9228	0.107678	2021	Plesionika sp.	1	159	40.1133	Inside	6.54649
JCFINP2103	28	14.1905	-92.9228	0.107678	2021	Portunus sp.	4	159	40.1133	Inside	6.54649
JCFINP2103	28	14.1905	-92.9228	0.107678	2021	Pyrosoma atlanticum	2	159	40.1133	Inside	6.54649
JCFINP2103	28	14.1905	-92.9228	0.107678	2021	Squilla sp.	229	159	40.1133	Inside	6.54649
JCFINP2103	28	14.1905	-92.9228	0.107678	2021	Vinciguerria lucetia	2	159	40.1133	Inside	6.54649
JCFINP2103	29	14.5129	-92.7613	0.0875487	2021	Argonauta nouryi	4	14	41.3179	Outside	153.675
JCFINP2103	29	14.5129	-92.7613	0.0875487	2021	Bothidae (larvae)	8	14	41.3179	Outside	153.675
JCFINP2103	29	14.5129	-92.7613	0.0875487	2021	Chloroscombrus orqueta	1	14	41.3179	Outside	153.675
JCFINP2103	29	14.5129	-92.7613	0.0875487	2021	Decapterus macrosoma	7	14	41.3179	Outside	153.675
JCFINP2103	29	14.5129	-92.7613	0.0875487	2021	Fistularia corneta	1	14	41.3179	Outside	153.675
JCFINP2103	29	14.5129	-92.7613	0.0875487	2021	Hydrozoa sp.3	1	14	41.3179	Outside	153.675
JCFINP2103	29	14.5129	-92.7613	0.0875487	2021	Lagocephalus sp. (juvenil)	1	14	41.3179	Outside	153.675
JCFINP2103	29	14.5129	-92.7613	0.0875487	2021	Paralichthyidae	1	14	41.3179	Outside	153.675
JCFINP2103	29	14.5129	-92.7613	0.0875487	2021	Portunus sp.	202	14	41.3179	Outside	153.675
JCFINP2103	29	14.5129	-92.7613	0.0875487	2021	Salpidae	7573	14	41.3179	Outside	153.675
JCFINP2103	29	14.5129	-92.7613	0.0875487	2021	Selene peruviana	8	14	41.3179	Outside	153.675
JCFINP2103	29	14.5129	-92.7613	0.0875487	2021	Serranidae	1	14	41.3179	Outside	153.675
JCFINP2103	3	15.0793	-97.3018	0.106897	2021	Bregmaceros bathymaster	43	26	64.7742	Outside	140.353
JCFINP2103	3	15.0793	-97.3018	0.106897	2021	Cyclopsetta querna	9	26	64.7742	Outside	140.353
JCFINP2103	3	15.0793	-97.3018	0.106897	2021	Dosidicus gigas	68	26	64.7742	Outside	140.353
JCFINP2103	3	15.0793	-97.3018	0.106897	2021	Fistularia commersonii	1	26	64.7742	Outside	140.353
JCFINP2103	3	15.0793	-97.3018	0.106897	2021	Leptocephala (larvae)	29	26	64.7742	Outside	140.353
JCFINP2103	3	15.0793	-97.3018	0.106897	2021	Myctophidae	1	26	64.7742	Outside	140.353
JCFINP2103	3	15.0793	-97.3018	0.106897	2021	Portunus sp.	56	26	64.7742	Outside	140.353
JCFINP2103	3	15.0793	-97.3018	0.106897	2021	Pyrosoma atlanticum	2	26	64.7742	Outside	140.353
JCFINP2103	3	15.0793	-97.3018	0.106897	2021	Selene peruviana	1	26	64.7742	Outside	140.353
JCFINP2103	30	14.6673	-92.6602	0.0686103	2021	Aluterus monoceros	1	8	42.1072	Outside	147.256
JCFINP2103	30	14.6673	-92.6602	0.0686103	2021	Anchoa sp.	52	8	42.1072	Outside	147.256
JCFINP2103	30	14.6673	-92.6602	0.0686103	2021	Chloroscombrus orqueta	2608	8	42.1072	Outside	147.256
JCFINP2103	30	14.6673	-92.6602	0.0686103	2021	Decapterus macrosoma	17	8	42.1072	Outside	147.256
JCFINP2103	30	14.6673	-92.6602	0.0686103	2021	Deckertichthys aureolus	13	8	42.1072	Outside	147.256
JCFINP2103	30	14.6673	-92.6602	0.0686103	2021	Eucinostomus gracilis	9	8	42.1072	Outside	147.256
JCFINP2103	30	14.6673	-92.6602	0.0686103	2021	Haemulopsis nitida	13	8	42.1072	Outside	147.256
JCFINP2103	30	14.6673	-92.6602	0.0686103	2021	Isopisthus altipinnis	1	8	42.1072	Outside	147.256
JCFINP2103	30	14.6673	-92.6602	0.0686103	2021	Loliginidae	28	8	42.1072	Outside	147.256
JCFINP2103	30	14.6673	-92.6602	0.0686103	2021	Opisthonema spp.	257	8	42.1072	Outside	147.256
JCFINP2103	30	14.6673	-92.6602	0.0686103	2021	Peprilus snyderi	367	8	42.1072	Outside	147.256
JCFINP2103	30	14.6673	-92.6602	0.0686103	2021	Pliosteostoma lutipinnis	5	8	42.1072	Outside	147.256
JCFINP2103	30	14.6673	-92.6602	0.0686103	2021	Polydactylus opercularis	8	8	42.1072	Outside	147.256
JCFINP2103	30	14.6673	-92.6602	0.0686103	2021	Selar crumenophthalmus	90	8	42.1072	Outside	147.256
JCFINP2103	30	14.6673	-92.6602	0.0686103	2021	Selene peruviana	71	8	42.1072	Outside	147.256
JCFINP2103	30	14.6673	-92.6602	0.0686103	2021	Sphyraena ensis	8	8	42.1072	Outside	147.256
JCFINP2103	4	14.7175	-97.4693	0.136803	2021	Argonauta nouryi	1	23	84.6003	Outside	145.14
JCFINP2103	4	14.7175	-97.4693	0.136803	2021	Leptocephala (larvae)	1	23	84.6003	Outside	145.14
JCFINP2103	4	14.7175	-97.4693	0.136803	2021	Portunus sp.	54	23	84.6003	Outside	145.14
JCFINP2103	4	14.7175	-97.4693	0.136803	2021	Salpidae	1	23	84.6003	Outside	145.14
JCFINP2103	5	15.6536	-96.6718	0.105883	2021	Grimothea planipes	2	62	51.4432	Inside	48.3432
JCFINP2103	5	15.6536	-96.6718	0.105883	2021	Leptocephala (larvae)	2	62	51.4432	Inside	48.3432
JCFINP2103	5	15.6536	-96.6718	0.105883	2021	Myctophidae	132	62	51.4432	Inside	48.3432
JCFINP2103	5	15.6536	-96.6718	0.105883	2021	Peprilus snyderi	25254	62	51.4432	Inside	48.3432
JCFINP2103	5	15.6536	-96.6718	0.105883	2021	Pontinus sp.	22	62	51.4432	Inside	48.3432
JCFINP2103	5	15.6536	-96.6718	0.105883	2021	Portunus sp.	3	62	51.4432	Inside	48.3432
JCFINP2103	5	15.6536	-96.6718	0.105883	2021	Squilla sp.	8	62	51.4432	Inside	48.3432
JCFINP2103	6	15.5902	-96.4982	0.0913129	2021	Argonauta nouryi	169	8	47.6682	Outside	145.223
JCFINP2103	6	15.5902	-96.4982	0.0913129	2021	Balistes polylepis	2	8	47.6682	Outside	145.223
JCFINP2103	6	15.5902	-96.4982	0.0913129	2021	Bregmaceros bathymaster	9	8	47.6682	Outside	145.223
JCFINP2103	6	15.5902	-96.4982	0.0913129	2021	Chloroscombrus orqueta	5	8	47.6682	Outside	145.223
JCFINP2103	6	15.5902	-96.4982	0.0913129	2021	Decapterus macrosoma	1	8	47.6682	Outside	145.223
JCFINP2103	6	15.5902	-96.4982	0.0913129	2021	Dosidicus gigas	182	8	47.6682	Outside	145.223
JCFINP2103	6	15.5902	-96.4982	0.0913129	2021	Enoploteuthidae	4	8	47.6682	Outside	145.223
JCFINP2103	6	15.5902	-96.4982	0.0913129	2021	Hemicaranx zelotes	8	8	47.6682	Outside	145.223
JCFINP2103	6	15.5902	-96.4982	0.0913129	2021	Leptocephala (larvae)	1	8	47.6682	Outside	145.223
JCFINP2103	6	15.5902	-96.4982	0.0913129	2021	Loliginidae	8	8	47.6682	Outside	145.223
JCFINP2103	6	15.5902	-96.4982	0.0913129	2021	Myctophidae	2175	8	47.6682	Outside	145.223
JCFINP2103	6	15.5902	-96.4982	0.0913129	2021	Portunus sp.	7	8	47.6682	Outside	145.223
JCFINP2103	6	15.5902	-96.4982	0.0913129	2021	Sarda orientalis	1	8	47.6682	Outside	145.223
JCFINP2103	6	15.5902	-96.4982	0.0913129	2021	Selene brevoortii	2	8	47.6682	Outside	145.223
JCFINP2103	6	15.5902	-96.4982	0.0913129	2021	Selene peruviana	62	8	47.6682	Outside	145.223
JCFINP2103	6	15.5902	-96.4982	0.0913129	2021	Vinciguerria lucetia	4	8	47.6682	Outside	145.223
JCFINP2103	7	14.3222	-96.8578	0.095591	2021	Chaunacidae	1	42	NA	Outside	NA
JCFINP2103	7	14.3222	-96.8578	0.095591	2021	Portunus sp.	5	42	NA	Outside	NA
JCFINP2103	7	14.3222	-96.8578	0.095591	2021	Salpidae	2	42	NA	Outside	NA
JCFINP2103	8	15.5573	-96.2351	0.130552	2021	Bregmaceros bathymaster	101	142	40.8842	Inside	3.55878
JCFINP2103	8	15.5573	-96.2351	0.130552	2021	Caranx caballus	1	142	40.8842	Inside	3.55878
JCFINP2103	8	15.5573	-96.2351	0.130552	2021	Cynoscion phoxocephalus	27	142	40.8842	Inside	3.55878
JCFINP2103	8	15.5573	-96.2351	0.130552	2021	Enoploteuthidae	2	142	40.8842	Inside	3.55878
JCFINP2103	8	15.5573	-96.2351	0.130552	2021	Japetella diaphana	1	142	40.8842	Inside	3.55878
JCFINP2103	8	15.5573	-96.2351	0.130552	2021	Leptocephala (larvae)	63	142	40.8842	Inside	3.55878
JCFINP2103	8	15.5573	-96.2351	0.130552	2021	Loliginidae	9	142	40.8842	Inside	3.55878
JCFINP2103	8	15.5573	-96.2351	0.130552	2021	Myctophidae	5983	142	40.8842	Inside	3.55878
JCFINP2103	8	15.5573	-96.2351	0.130552	2021	Peprilus snyderi	27	142	40.8842	Inside	3.55878
JCFINP2103	8	15.5573	-96.2351	0.130552	2021	Portunus sp.	2	142	40.8842	Inside	3.55878
JCFINP2103	8	15.5573	-96.2351	0.130552	2021	Psenes sio	2	142	40.8842	Inside	3.55878
JCFINP2103	8	15.5573	-96.2351	0.130552	2021	Salpidae	44	142	40.8842	Inside	3.55878
JCFINP2103	8	15.5573	-96.2351	0.130552	2021	Scorpaena russula	3	142	40.8842	Inside	3.55878
JCFINP2103	8	15.5573	-96.2351	0.130552	2021	Scyphozoa	20	142	40.8842	Inside	3.55878
JCFINP2103	8	15.5573	-96.2351	0.130552	2021	Solenocera mutator	104	142	40.8842	Inside	3.55878
JCFINP2103	8	15.5573	-96.2351	0.130552	2021	Squilla biformis	226	142	40.8842	Inside	3.55878
JCFINP2103	8	15.5573	-96.2351	0.130552	2021	Trichiurus nitens	5	142	40.8842	Inside	3.55878
JCFINP2103	8	15.5573	-96.2351	0.130552	2021	Vinciguerria lucetia	74	142	40.8842	Inside	3.55878
JCFINP2103	9	15.7248	-95.8677	0.134344	2021	Bregmaceros bathymaster	9	7	38.6126	Outside	149.193
JCFINP2103	9	15.7248	-95.8677	0.134344	2021	Enoploteuthidae	18	7	38.6126	Outside	149.193
JCFINP2103	9	15.7248	-95.8677	0.134344	2021	Myctophidae	10637	7	38.6126	Outside	149.193
JCFINP2103	9	15.7248	-95.8677	0.134344	2021	Scyphozoa	1	7	38.6126	Outside	149.193
JCFINP2103	9	15.7248	-95.8677	0.134344	2021	Selene brevoortii	9	7	38.6126	Outside	149.193
JCFINP2103	9	15.7248	-95.8677	0.134344	2021	Selene peruviana	45	7	38.6126	Outside	149.193
JCFINP2103	9	15.7248	-95.8677	0.134344	2021	Vinciguerria lucetia	9	7	38.6126	Outside	149.193
